# Supplementary material for: Ultrastrong, flame-retardant, intrinsically weldable, and highly conductive metallized Kevlar fabrics
Source: Royal Society of Chemistry journal article supplement (doi:10.1039/d2ta05702f), 2022-01-01
Supplement: d2ta05702f1.pdf [file d2ta05702f1.pdf]

Electronic Supplementary Material (ESI) for Journal of Materials Chemistry A.

This journal is © The Royal Society of Chemistry 2022

Electronic Supplementary Information (ESI)

**Ultra-Strong, Flame-Retardant, Intrinsically Weldable, and Highly Conductive  
Metallized Kevlar Fabrics**

Xi Lu,<sup>†</sup> Yusheng Ye,<sup>†</sup> Wenhui Shang, Simin Huang, Haifei Wang, Tiansheng Gan,  
Guokang Chen, Libo Deng, Qixing Wu, Xuechang Zhou\*

College of Chemistry and Environmental Engineering

Shenzhen University

Shenzhen 518060, P. R. China

E-mail: [xczhou@szu.edu.cn](mailto:xczhou@szu.edu.cn)

<sup>†</sup> These authors contributed equally to this work.

The ESI includes:

Figure S1–S18

Table S1–S2

Movie S1–S4

References

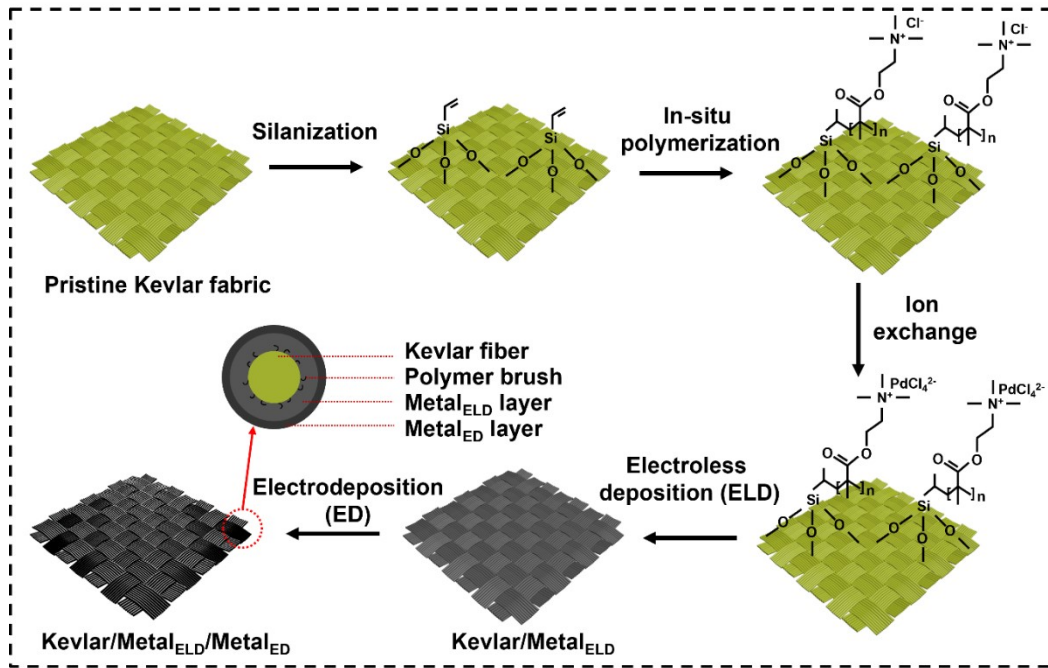

**Figure S1.** Schematic illustration of the fabrication process of metallized Kevlar fabrics, consisting of polymer-assisted electroless deposition and electrodeposition.

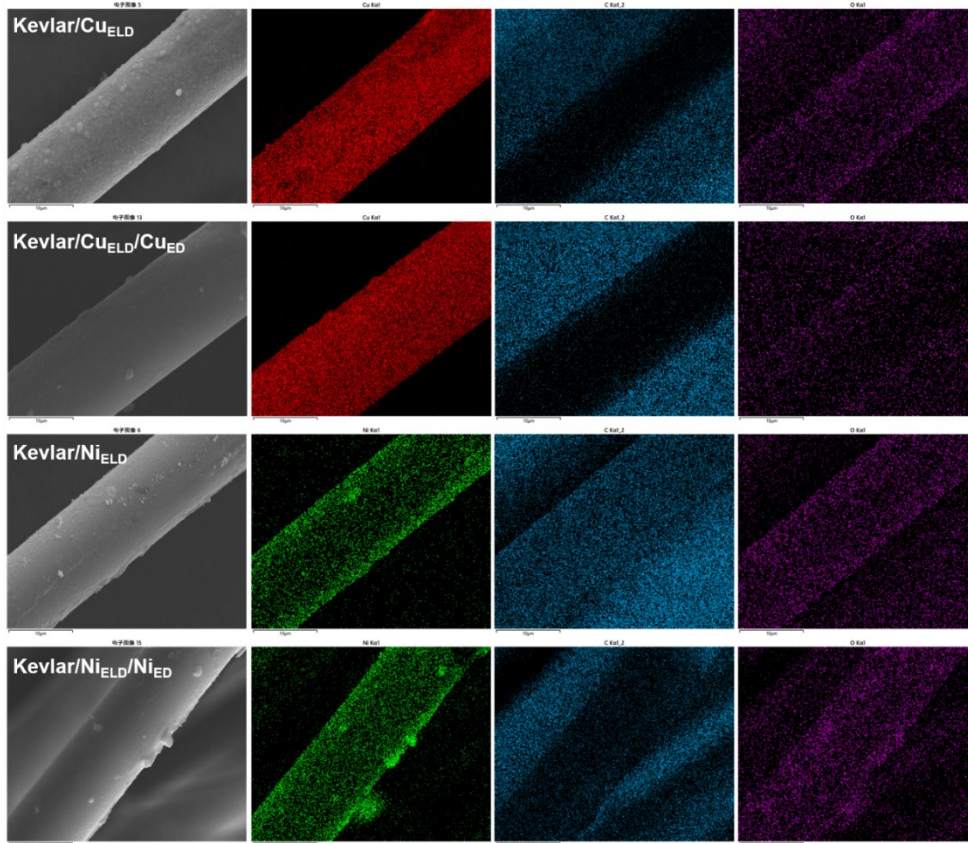

**Figure S2.** SEM images and EDS analysis of metallized Kevlar fabrics: Kevlar/Cu<sub>ELD</sub>, Kevlar/Cu<sub>ELD</sub>/Cu<sub>ED</sub>, Kevlar/Ni<sub>ELD</sub>, and Kevlar/Ni<sub>ELD</sub>/Ni<sub>ED</sub>.

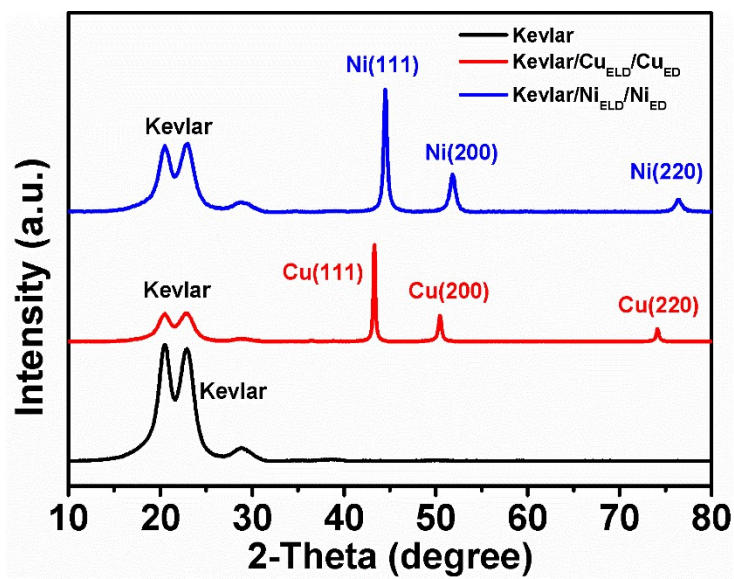

**Figure S3.** XRD analysis of bare Kevlar fabric and metallized Kevlar fabrics.

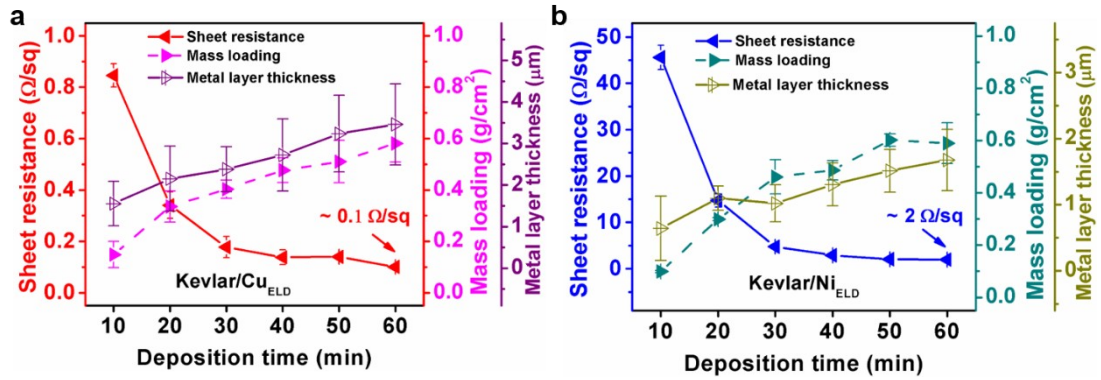

**Figure S4.** Sheet resistances, mass loadings, and metal layer thicknesses of ELD-based metallized Kevlar fabrics: a) Kevlar/Cu<sub>ELD</sub> and b) Kevlar/Ni<sub>ELD</sub>. The thickness of deposited metal layer = (diameter of metallized fiber – diameter of bare fiber) / 2. The diameter of fiber was measured on SEM, and the number of parallel samples is more than five.

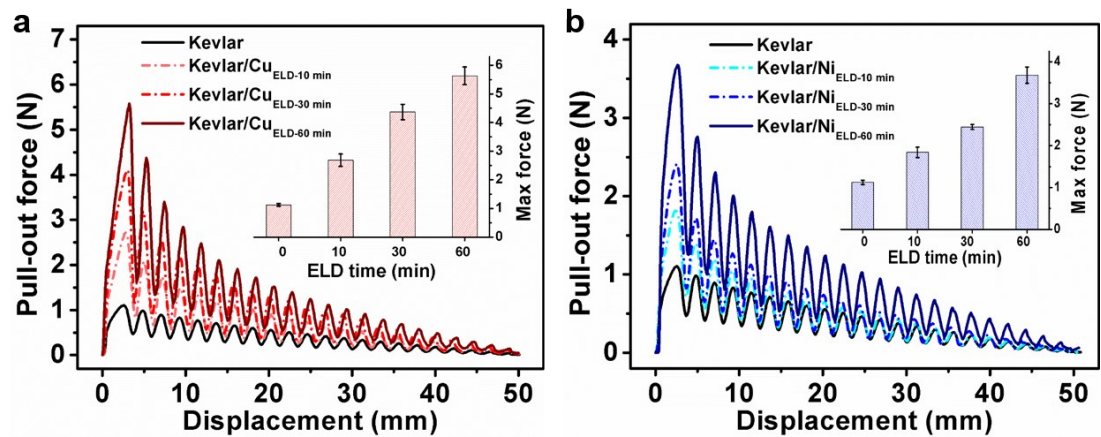

**Figure S5.** a) Single yarn pull-out test of a) Kevlar/Cu<sub>ELD</sub> and b) Kevlar/Ni<sub>ELD</sub> (inset: maximum pull-out force versus ELD time).

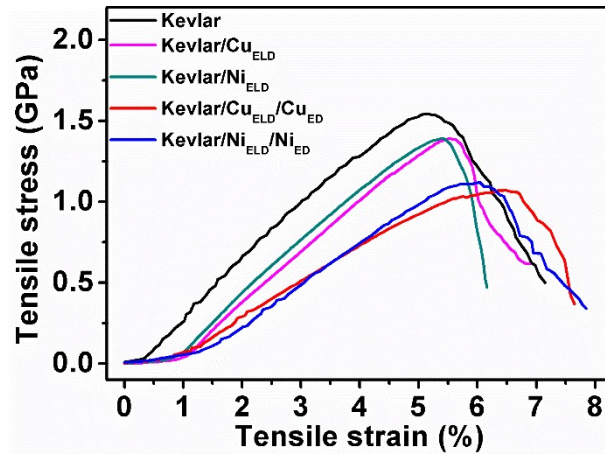

**Figure S6.** Tensile test of bare Kevlar fabric and metallized Kevlar fabrics.

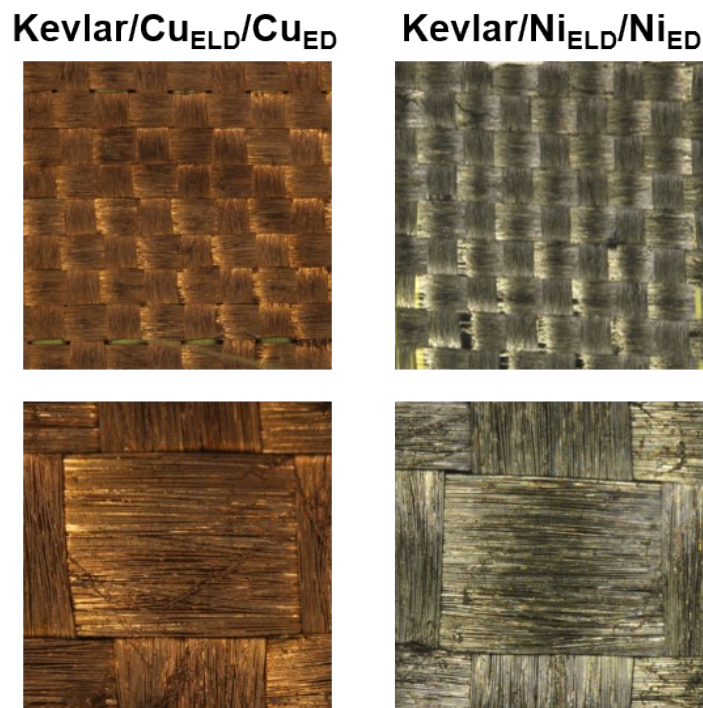

**Figure S7.** Optical microscope images of metallized Kevlar fabrics after cyclic bending test.

**Kevlar/Cu<sub>ELD</sub>/Cu<sub>ED</sub>**

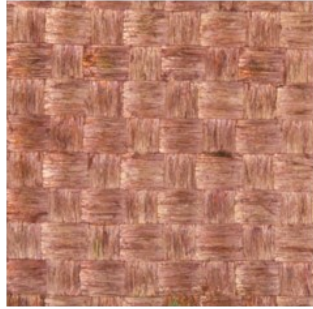

**Kevlar/Ni<sub>ELD</sub>/Ni<sub>ED</sub>**

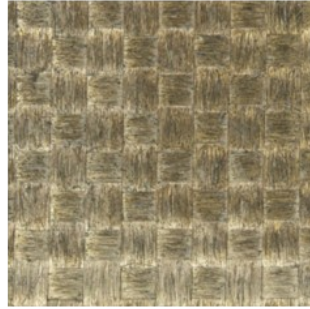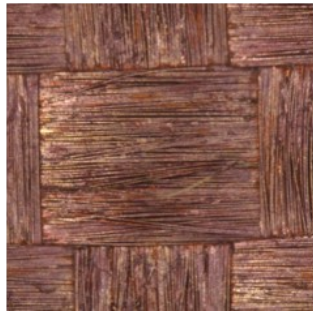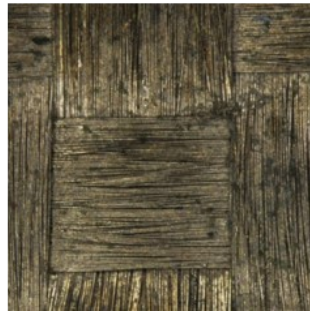

**Figure S8.** Optical microscope images of metallized Kevlar fabrics after cyclic attach–detach test.

**Kevlar/Cu<sub>ELD</sub>/Cu<sub>ED</sub>**

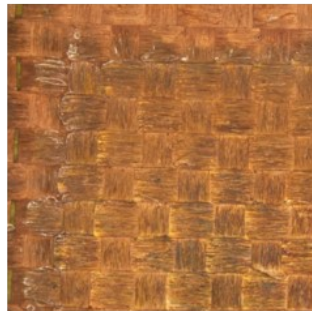

**Kevlar/Ni<sub>ELD</sub>/Ni<sub>ED</sub>**

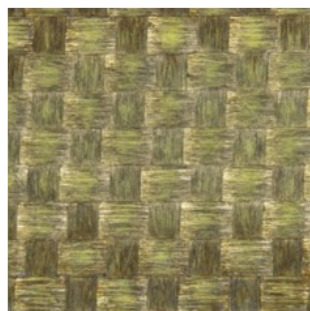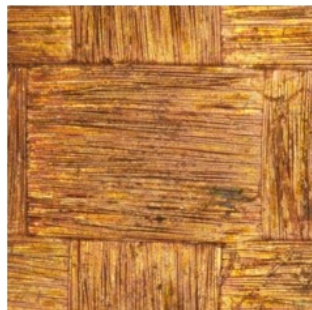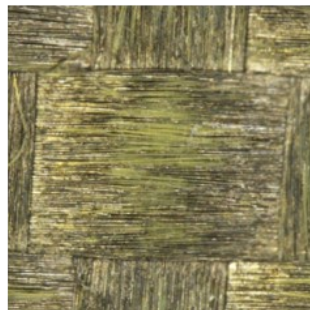

**Figure S9.** Optical microscope images of metallized Kevlar fabrics after simulated washing test.

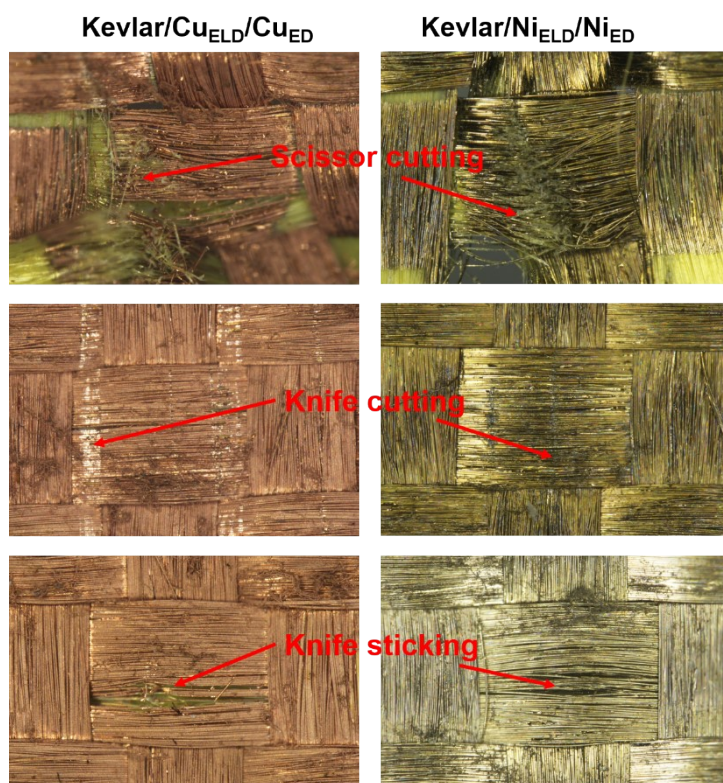

**Figure S10.** Optical microscope images of metallized Kevlar fabrics after mechanical tortures, i.e., scissor cutting, knife cutting and knife sticking.

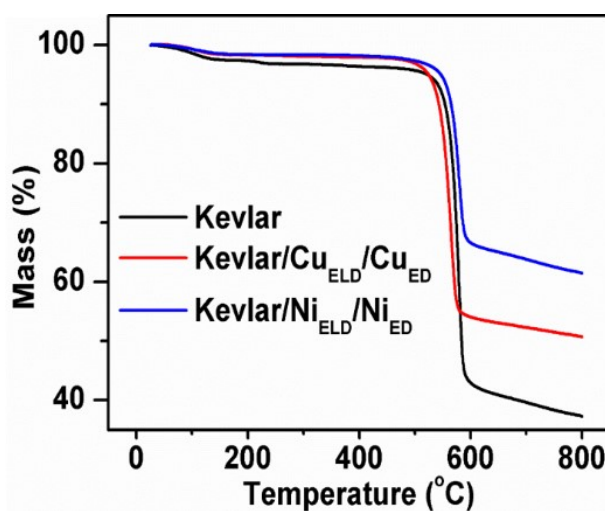

**Figure S11.** Thermogravimetric analysis (TGA) of neat Kevlar fabric and metallized Kevlar fabrics.

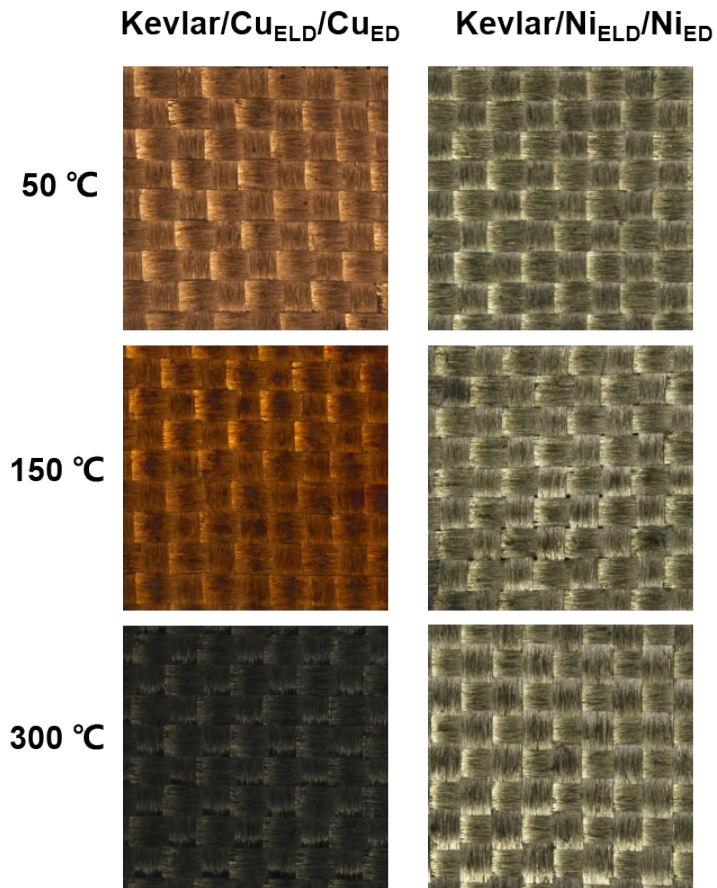

**Figure S12.** Optical microscope images of metallized Kevlar fabrics after heating treatments at different temperatures (50 °C, 150 °C, and 300 °C) for 1 h.

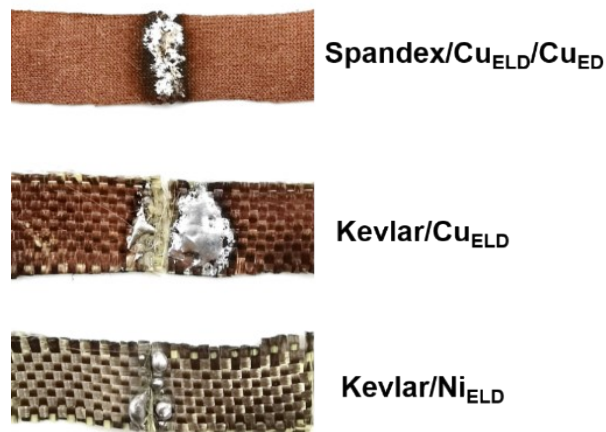

**Figure S13.** Control groups, Spandex/Cu<sub>ELD</sub>/Cu<sub>ED</sub>, Kevlar/Cu<sub>ELD</sub> (with 1.6- $\mu$ m thickness of metal layer), and Kevlar/Ni<sub>ELD</sub> (with 0.6- $\mu$ m thickness of metal layer) failed in the welding process with solder materials.



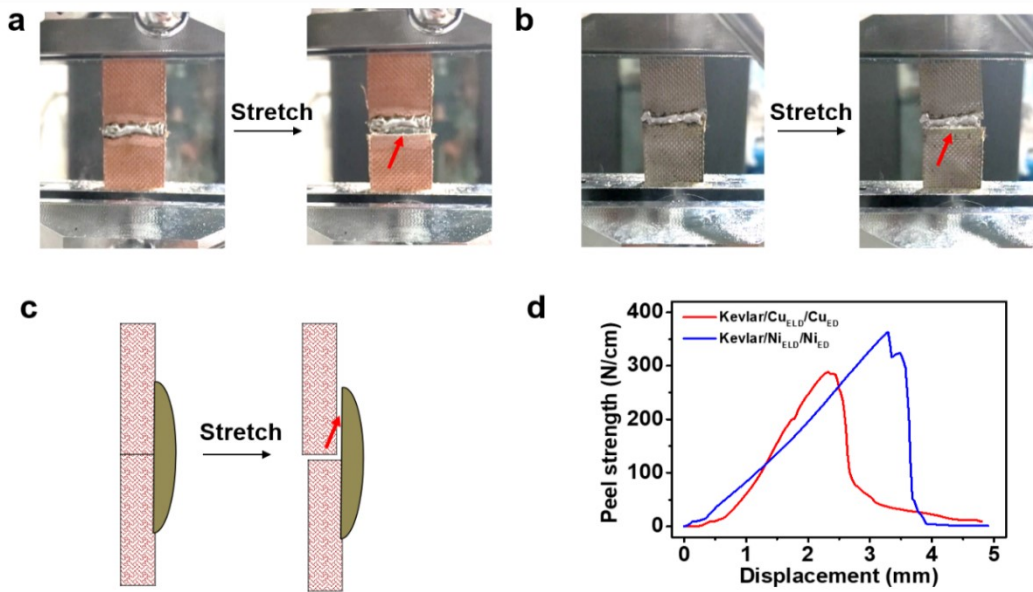

**Figure S14.** Mechanical properties of MKFs after welded with solders. Tensile tests of welded MKFs: a) Kevlar/Cu<sub>ELD</sub>/Cu<sub>ED</sub> and b) Kevlar/Ni<sub>ELD</sub>/Ni<sub>ED</sub>. c) Schematic diagram of welded MKF fractured at the interface of deposited metal layer and the solder. d) Curves of peel strength vs displacement of welded MKFs.

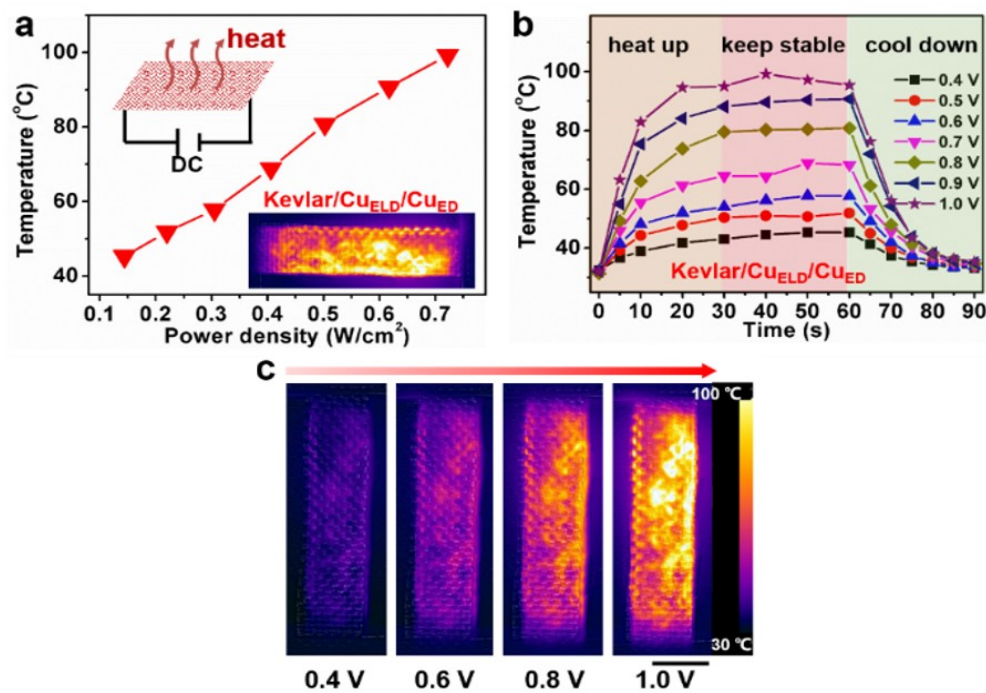

**Figure S15.** Heater based on Kevlar/Cu<sub>ELD</sub>/Cu<sub>ED</sub>. a) Temperature as a function of the input power density. b) Temperature as a function of the time at different applied voltages (0.5–3.0 V). c) IR images of the heater at different applied voltages. Scale bar, 1 cm.



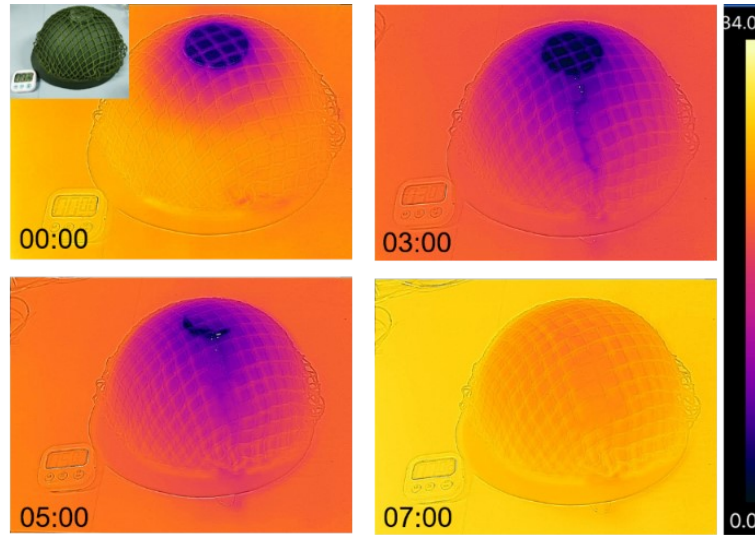

**Figure S16.** Ice on the helmet naturally melting needs about 7 min. In contrast, MKF-based heater can accelerate the ice melting within 2.5 min, as shown in Figure 4f.

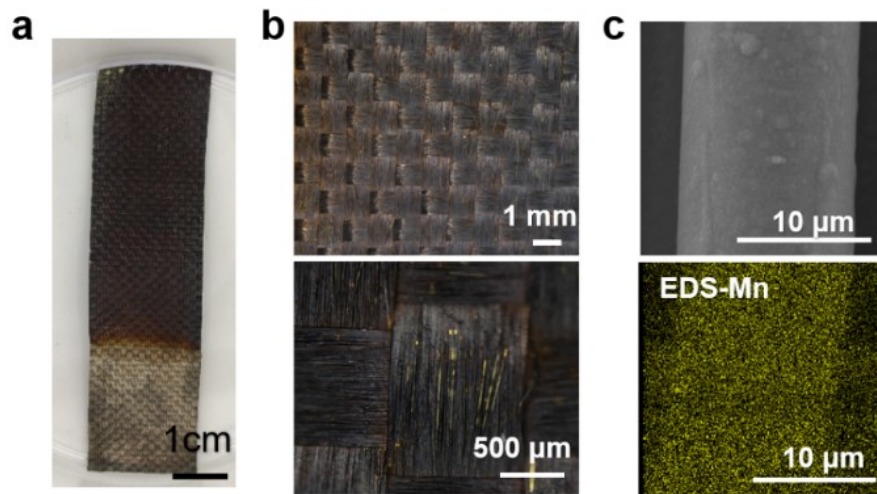

**Figure S17.** Morphology of SC electrode: Kevlar/Ni<sub>ELD</sub>/Ni<sub>ED</sub>/MnO<sub>2</sub>. a) Photograph, b) Optical microscope images, and c) SEM image and EDS of manganese element on Kevlar fiber.

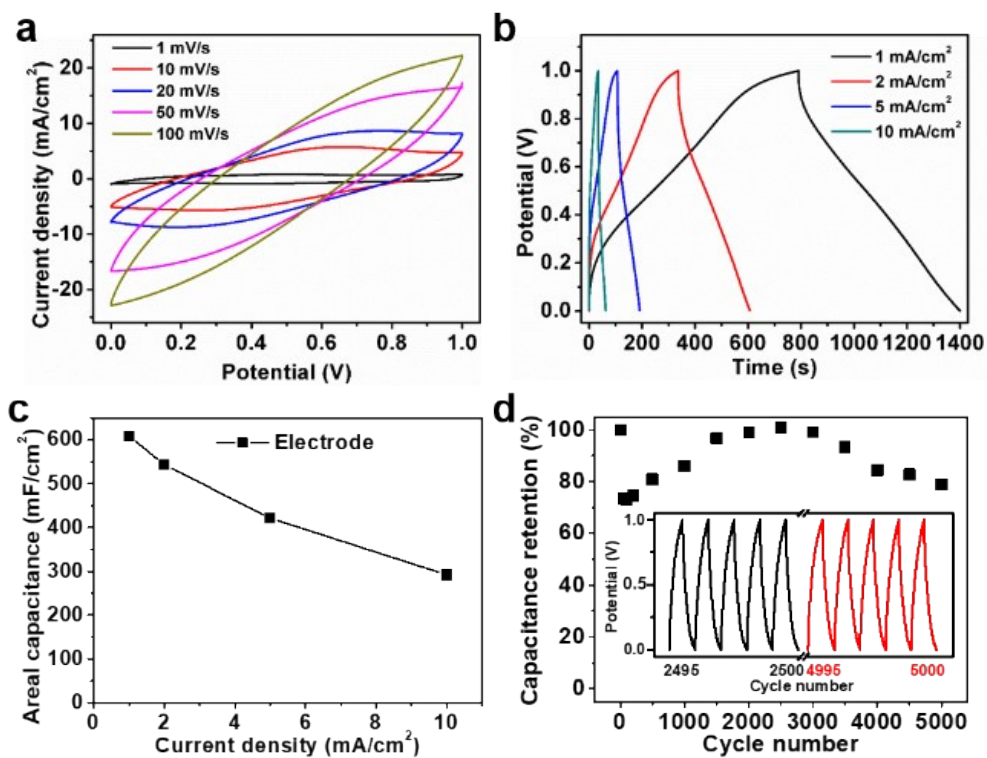

**Figure S18.** a) CV curves of SC electrode Kevlar/Ni<sub>ELD</sub>/Ni<sub>ED</sub>/MnO<sub>2</sub> at different scan rate. b) GCD curves of Kevlar/Ni<sub>ELD</sub>/Ni<sub>ED</sub>/MnO<sub>2</sub> at different current density. c) Areal specific capacitance of Kevlar/Ni<sub>ELD</sub>/Ni<sub>ED</sub>/MnO<sub>2</sub> at different current density. d) Capacitance retention of supercapacitor device at 10 mA cm<sup>-2</sup>, inset is the GCD curves of first and last 5 cycles.

**Movie S1.** MKF-based tough conductor working stably during scissor cutting and knife cutting.

**Movie S2.** MKF-based wearable heater as knee bands with warming function.

**Movie S3.** MKF-based flexible heater used to boil up water.

**Movie S4.** MKF-based supercapacitors operating stably during various torture tests: Scissor cutting, knife cutting, and knife sticking.

**Table S1.** Comparison of heating performance of fabrics-based flexible heaters.

| Textile-based heaters                                   | Voltage (V) | Maximum temperature (°C) | Ref.             |
|---------------------------------------------------------|-------------|--------------------------|------------------|
| Carbonized fabric                                       | 4           | 175                      | 1                |
| Nylon fabric/CuNWs                                      | 1.8         | 143.1                    | 2                |
| CNTs/glucuric acid/chitosan textile                     | 9           | 149                      | 3                |
| Cellulose fabric/MXene                                  | 6           | 100                      | 4                |
| Cotton fabric/MXene                                     | 6           | 150                      | 5                |
| Cotton fabric/rGO/PEDOT:PSS                             | 30          | 70                       | 6                |
| Cotton fabric/CuNWs/CNT/cellulose                       | 1.8         | 70                       | 7                |
| Kevlar/Ag@Ni <sub>x</sub> Co <sub>1-x</sub> Se/PDMS/rGO | 2.1         | 79                       | 8                |
| Kevlar fabric/MXene/Fe <sub>x</sub> Co <sub>1-x</sub> P | 3           | 74                       | 9                |
| Elastomer/CNT textile                                   | 8           | 95                       | 10               |
| PET textiles/PPy/MXene                                  | 4           | 79                       | 11               |
| Silk nanofiber network/CNT                              | 12          | 65                       | 12               |
| SBS elastomer mesh/AgNWs                                | 1           | 40                       | 13               |
| Liquid-metal fibre mat                                  | 0.48        | 95                       | 14               |
| Carbonized silk/ceramic composites                      | 10          | 239                      | 15               |
| Cotton fabric/CNT                                       | 40          | 96                       | 16               |
| Carbon fabric/PDA/ZrO <sub>2</sub>                      | 10          | 60                       | 17               |
| Polyester fabric/carbon black/PU                        | 20          | 85                       | 18               |
| Spandex fabrics/Cu <sub>ELD</sub> /Cu <sub>ED</sub>     | 3.5         | 50.5                     | 19               |
| <b>Kevlar/Ni<sub>ELD</sub>/Ni<sub>ED</sub></b>          | <b>3.5</b>  | <b>296</b>               | <b>This work</b> |

**Table S2.** Comparison of tensile strength and areal capacitance of SC electrodes.

| SC electrodes                                                  | Tensile stress (MPa) | Areal capacitance (mF cm <sup>-2</sup> ) | Ref.             |
|----------------------------------------------------------------|----------------------|------------------------------------------|------------------|
| Aramid Nanofibers/MWCNTs/PANi                                  | 158.7                | 497.3                                    | 20               |
| PPy/NCFs paper                                                 | 14.3                 | 1629                                     | 21               |
| PPy@MnO <sub>2</sub> @rGO@Conductive Yarns                     | 700                  | 486                                      | 22               |
| Ti <sub>3</sub> C <sub>2</sub> T <sub>x</sub> MXene film       | 32                   | 1380                                     | 23               |
|                                                                | 26                   | 1590                                     |                  |
| PVA/PEDOT:PSS Hydrogel                                         | 9.21                 | 380.8                                    | 24               |
| PVA/PANi hydrogel                                              | 2.4                  | 602                                      | 25               |
| rGO/MnO <sub>2</sub> paper                                     | 8.79                 | 897                                      | 26               |
| rGO/PPy/cellulose hybrid paper                                 | 4.8                  | 1200                                     | 27               |
| Graphene/WS <sub>2</sub> nanoflake paper                       | 55.7                 | 241.2                                    | 28               |
| CNT/PPy                                                        | 16                   | 280                                      | 29               |
| Graphene/cellulose paper                                       | 8.67                 | 81                                       | 30               |
| <b>Kevlar/Ni<sub>ELD</sub>/Ni<sub>ED</sub>/MnO<sub>2</sub></b> | <b>1000</b>          | <b>608.9</b>                             | <b>This work</b> |

## References

1. M. Zhang, C. Wang, X. Liang, Z. Yin, K. Xia, H. Wang, M. Jian and Y. Zhang, *Adv. Electron. Mater.*, 2017, **3**, 1700193.
2. Z. Guo, C. Sun, J. Zhao, Z. Cai and F. Ge, *Adv. Mater. Interfaces*, 2021, **8**, 2001695.
3. S. Zhu, M. Wang, Z. Qiang, J. Song, Y. Wang, Y. Fan, Z. You, Y. Liao, M. Zhu and C. Ye, *Chem. Eng. J.*, 2021, **406**, 127140.
4. X. Zhao, L.-Y. Wang, C.-Y. Tang, X.-J. Zha, Y. Liu, B.-H. Su, K. Ke, R.-Y. Bao, M.-B. Yang and W. Yang, *ACS Nano*, 2020, **14**, 8793-8805.
5. X. Zhang, X. Wang, Z. Lei, L. Wang, M. Tian, S. Zhu, H. Xiao, X. Tang and L. Qu, *ACS Appl. Mater. Interfaces*, 2020, **12**, 14459-14467.
6. A. Ahmed, M. A. Jalil, M. M. Hossain, M. Moniruzzaman, B. Adak, M. T. Islam, M. S. Parvez and S. Mukhopadhyay, *J. Mater. Chem. C*, 2020, **8**, 16204-16215.
7. Z. Guo, C. Sun, J. Wang, Z. Cai and F. Ge, *ACS Appl. Mater. Interfaces*, 2021, **13**, 8851-8862.
8. A. Hazarika, B. K. Deka, C. Jeong, Y. B. Park and H. W. Park, *Adv. Funct. Mater.*, 2019, **29**, 1903144.
9. A. Hazarika, B. K. Deka, J. Seo, H. E. Jeong, Y.-B. Park and H. W. Park, *Nano Energy*, 2021, **86**, 106042.
10. Y. Li, Z. Zhang, X. Li, J. Zhang, H. Lou, X. Shi, X. Cheng and H. Peng, *J. Mater. Chem. C*, 2017, **5**, 41-46.
11. Q.-W. Wang, H.-B. Zhang, J. Liu, S. Zhao, X. Xie, L. Liu, R. Yang, N. Koratkar and Z.-Z. Yu, *Adv. Funct. Mater.*, 2019, **29**, 1806819.
12. N. Gogurla, Y. Kim, S. Cho, J. Kim and S. Kim, *Adv. Mater.*, 2021, **33**, 2008308.
13. S. Choi, J. Park, W. Hyun, J. Kim, J. Kim, Y. B. Lee, C. Song, H. J. Hwang, J. H. Kim, T. Hyeon and D.-H. Kim, *ACS Nano*, 2015, **9**, 6626-6633.
14. Z. Ma, Q. Huang, Q. Xu, Q. Zhuang, X. Zhao, Y. Yang, H. Qiu, Z. Yang, C. Wang, Y. Chai and Z. Zheng, *Nat. Mater.*, 2021, **20**, 859-868.
15. D. Li, B. Tang, X. Lu, W. Chen, X. Dong, J. Wang and X. Wang, *Composites Part A: Applied Science and Manufacturing*, 2021, **141**, 106237.
16. P. Ilanchezhian, A. S. Zakirov, G. M. Kumar, S. U. Yuldashev, H. D. Cho, T. W. Kang and A. T. Mamadalimov, *RSC Adv.*, 2015, **5**, 10697-10702.
17. T. Tian, X. Wei, A. Elhassan, J. Yu, Z. Li and B. Ding, *Chem. Eng. J.*, 2021, **417**, 128114.
18. L. R. Pahalagedara, Induni W. Siriwardane, N. D. Tissera, R. N. Wijesena and K. M. N. de Silva, *RSC Adv.*, 2017, **7**, 19174-19180.
19. X. Lu, W. Shang, G. Chen, H. Wang, P. Tan, X. Deng, H. Song, Z. Xu, J. Huang and X. Zhou, *ACS Appl. Electron. Mater.*, 2021, **3**, 1477-1488.
20. X. Zhan, Q. Yin, W. Mai, Y. Wang, A. F. A. A. Melo, K. Jiang, H. Jia and Q. Ji, *J. Electrochem. Soc.*, 2021, **168**, 020513.
21. Z. Wang, D. O. Carlsson, P. Tammela, K. Hua, P. Zhang, L. Nyholm and M. Strømme, *ACS Nano*, 2015, **9**, 7563-7571.
22. Y. Huang, H. Hu, Y. Huang, M. Zhu, W. Meng, C. Liu, Z. Pei, C. Hao, Z. Wang and C. Zhi, *ACS Nano*, 2015, **9**, 4766-4775.
23. X. Zhao, Z. Wang, J. Dong, T. Huang, Q. Zhang and L. Zhang, *J. Power Sources*,



- 2020, **470**, 228356.
24. Q. Liu, J. Qiu, C. Yang, L. Zang, G. Zhang and E. Sakai, *Adv. Mater. Technol.*, 2021, **6**, 2000919.
  25. Y. Zou, C. Chen, Y. Sun, S. Gan, L. Dong, J. Zhao and J. Rong, *Chem. Eng. J.*, 2021, **418**, 128616.
  26. A. Sumboja, C. Y. Foo, X. Wang and P. S. Lee, *Adv. Mater.*, 2013, **25**, 2809-2815.
  27. C. Wan, Y. Jiao and J. Li, *J. Mater. Chem. A*, 2017, **5**, 3819-3831.
  28. J. Li, K. Liao, X. Wang, P. Shi, J. Fan, Q. Xu and Y. Min, *Adv. Mater. Interfaces*, 2017, **4**, 1700419.
  29. Y. Chen, L. Du, P. Yang, P. Sun, X. Yu and W. Mai, *J. Power Sources*, 2015, **287**, 68-74.
  30. Z. Weng, Y. Su, D.-W. Wang, F. Li, J. Du and H.-M. Cheng, *Adv. Energy Mater.*, 2011, **1**, 917-922.
